# Supplementary material for: The role of bivalent ions in the regulation of D-loop extension mediated by DMC1 during meiotic recombination
Source: PubMed Central journal article supplement — iScience. 2022 Oct 25;25(11):105439. doi: 10.1016/j.isci.2022.105439 (PMC9641244; doi:10.1016/j.isci.2022.105439), 2022-10-25
Supplement: mmc1.pdf [file mmc1.pdf]

**iScience, Volume 25**

**Supplemental information**

**The role of bivalent ions in the regulation  
of D-loop extension mediated by DMC1  
during meiotic recombination**

**Veronika Altmannova, Mario Spirek, Lucija Orlic, Atis Jēkabsons, Tereza Clarence, Adrian Henggeler, Jarmila Mlcouskova, Raphaël A.G. Chaleil, Joao Matos, and Lumir Krejci**

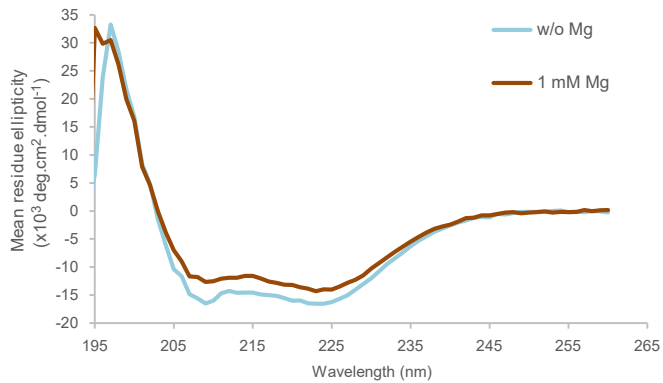

**Figure S1, related to Figure 1A.** *Effect of magnesium ions on the secondary structure of DMC1.* CD spectra of the human DMC1 protein (5  $\mu$ M) in the presence of ATP (0.3 mM) and in the absence (light blue line) or in the presence of 1 mM MgCl<sub>2</sub> (brown line).

A

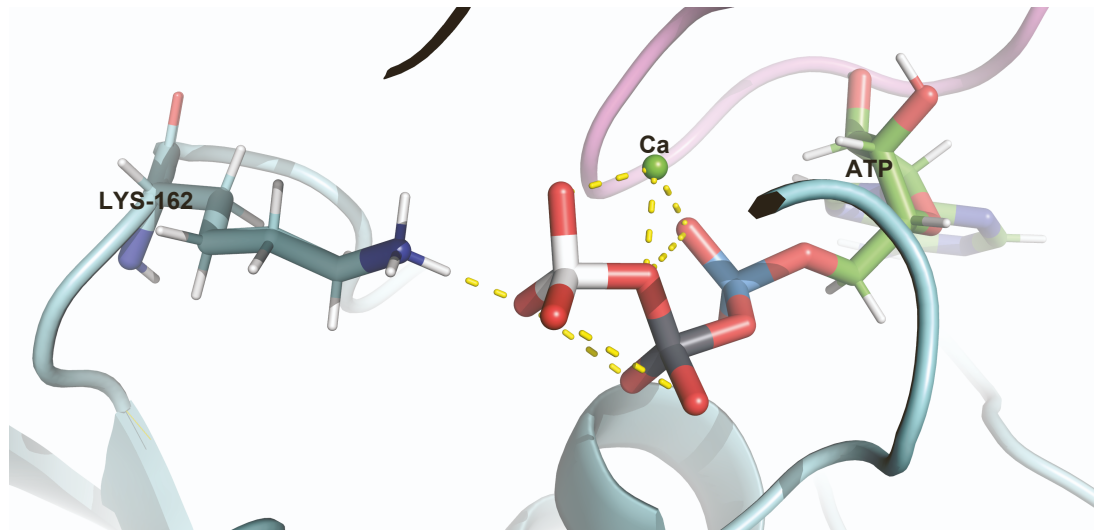

B

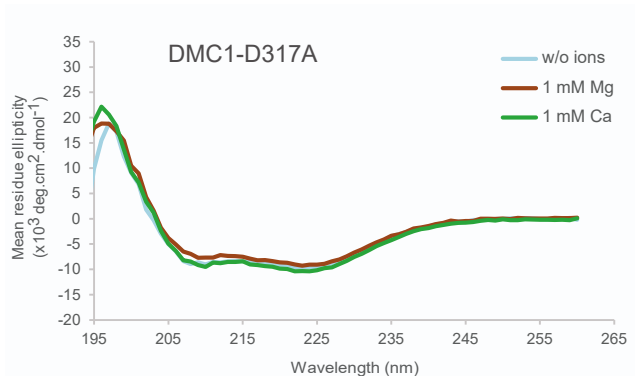

C

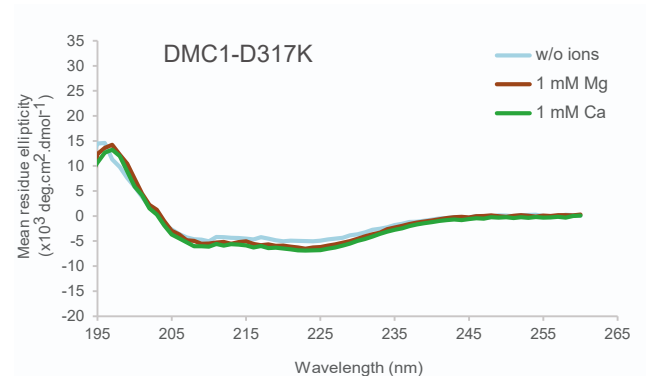

D

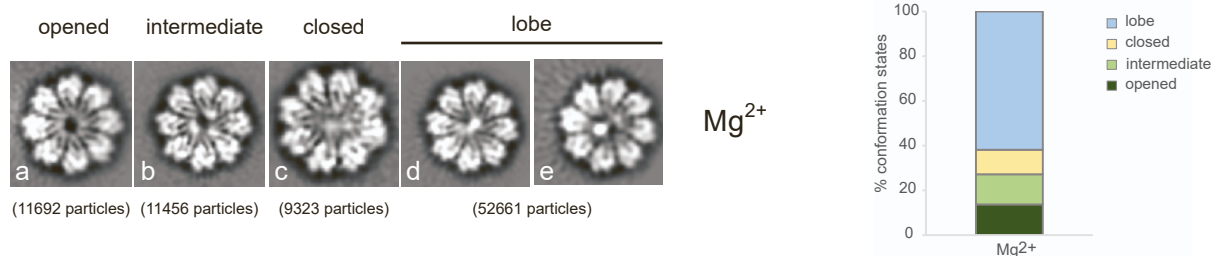

| Image | Conformation state | RGB scale | Outer particle diameter, Å | Inner particle diameter, Å |
|-------|--------------------|-----------|----------------------------|----------------------------|
| a     | opened             | 0         | 131                        | 16                         |
| b     | intermediate       | 41        | 135                        | 12                         |
| c     | closed             | 176       | 137                        | n.a.                       |
| d     | lobe               | 255       | 138                        | n.a.                       |
| e     | lobe               | 255       | 138                        | n.a.                       |

**Figure S2, related to Figure 2. Structural and biophysical analysis of DMC1 mutants.** (A) Molecular simulation of DMC1-E162K in the presence of  $\text{Ca}^{2+}$  and ATP. (B) CD spectra of the human DMC1-D317A mutant ( $5 \mu\text{M}$ ) and ATP ( $0.3 \text{ mM}$ ), in the absence of bivalent ions (light blue line) or in the presence of  $1 \text{ mM MgCl}_2$  (brown line) or  $1 \text{ mM CaCl}_2$  (green line), respectively. (C) CD spectra of the human DMC1-D317K mutant ( $5 \mu\text{M}$ ) and ATP ( $0.3 \text{ mM}$ ), in the absence of bivalent ions (light blue line) or in the presence of  $1 \text{ mM MgCl}_2$  (brown line) or  $1 \text{ mM CaCl}_2$  (green line), respectively. (D) 2D class averages of cryo-EM particles of human DMC1-D317K mutant in the presence of  $\text{MgCl}_2$  and ATP representing “opened” (a), “intermediate” (b), “closed” (c) and “lobe” (d and e) states. Classification of individual states was based on RGB scale in range from 0 (black color) to 255 (white color), respectively. The intensity in RGB scale 1-50 corresponds to opened, 51-100 to intermediate, 101-200 to closed, and 201-300 to lobe forms, respectively.

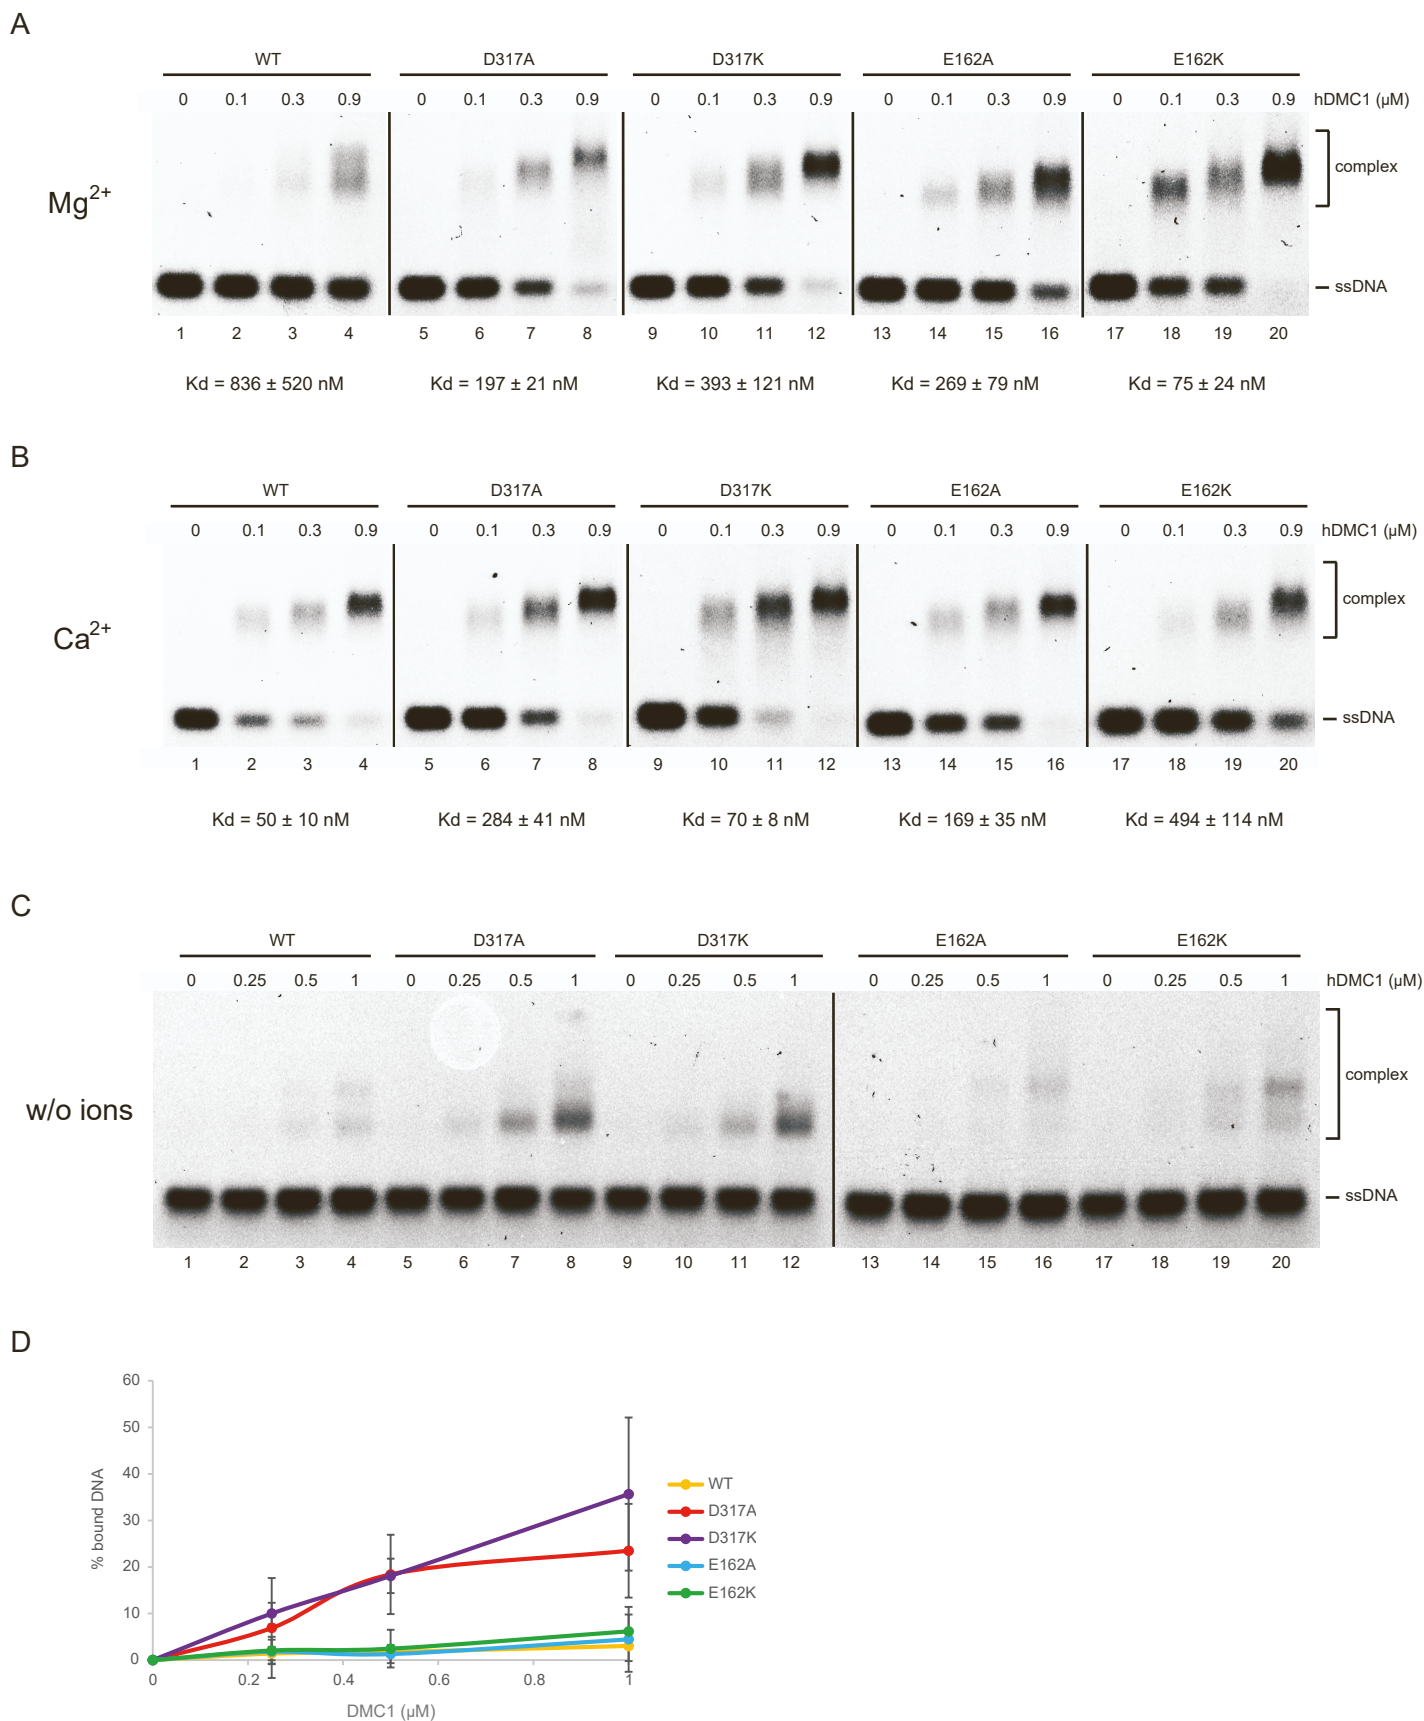

**Figure S3, related to Figure 2. *ssDNA binding activity of DMC1 mutants.*** (A) Representative gels of data from Figure 2D including the dissociation constants of DNA binding affinity. The  $K_d$  values were calculated using GraphPad Prism software. (B) Representative gels of data from Figure 2E including the dissociation constants of DNA binding affinity. The  $K_d$  values were calculated using GraphPad Prism software. (C) DNA binding of DMC1 mutants (0.25, 0.5 and 1  $\mu$ M) to 5'-fluorescently labeled ssDNA (pR231, 0.9  $\mu$ M nucleotides) in the absence of bivalent ions analyzed by gel-based assay. (D) Graphical representation of data from (C). The error bars represent the standard deviation from three independent experiments.

A

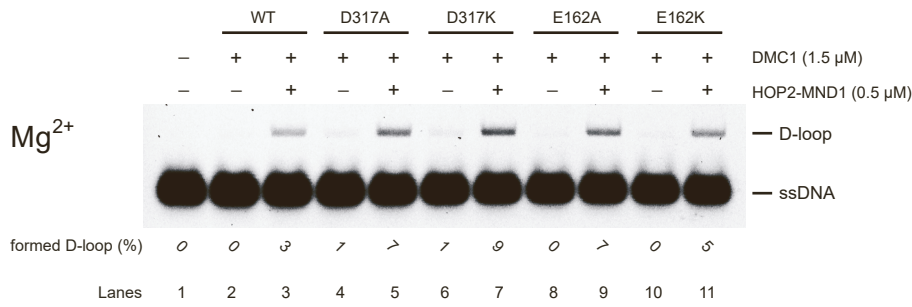

B

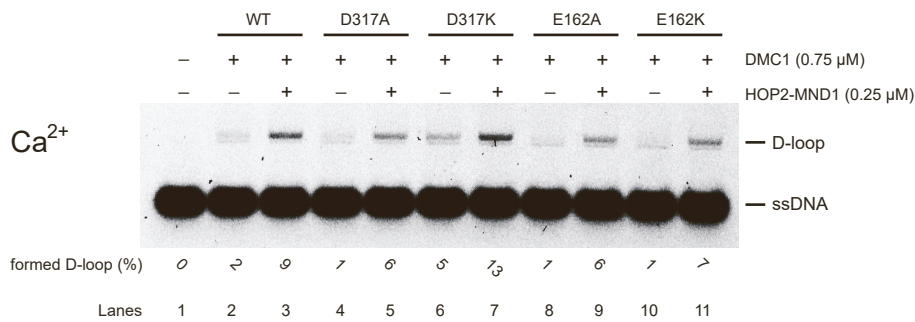

**Figure S4, related to Figure 3. *HOP2-MND1* stimulates D-loop activity of DMC1 mutants.** (A) DMC1 mutants (1.5 μM) were incubated with fluorescently labeled 90-mer ssDNA in the presence of 1 mM MgCl<sub>2</sub>. HOP2-MND1 complex (0.5 μM) was added to the indicated reactions followed by the addition of pBluescript plasmid DNA. (B) DMC1 mutants (0.75 μM) were incubated with fluorescently labeled 90-mer ssDNA in the presence of 1 mM CaCl<sub>2</sub>. HOP2-MND1 complex (0.25 μM) was added to the indicated reactions followed by the addition of pBluescript plasmid DNA.

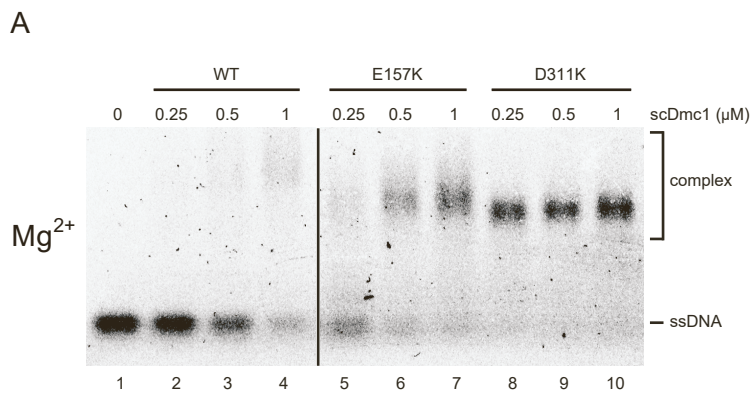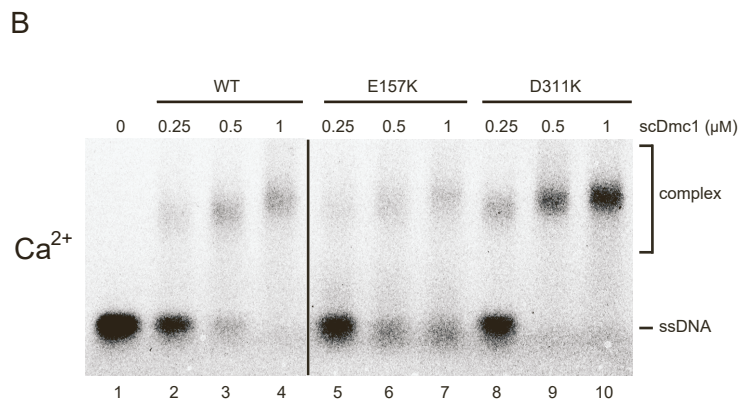

**Figure S5, related to Figure 5. *ssDNA binding activity of yeast Dmc1 mutants.* (A) Representative gels of data from Figure 5B. (B) Representative gels of data from Figure 5C.**

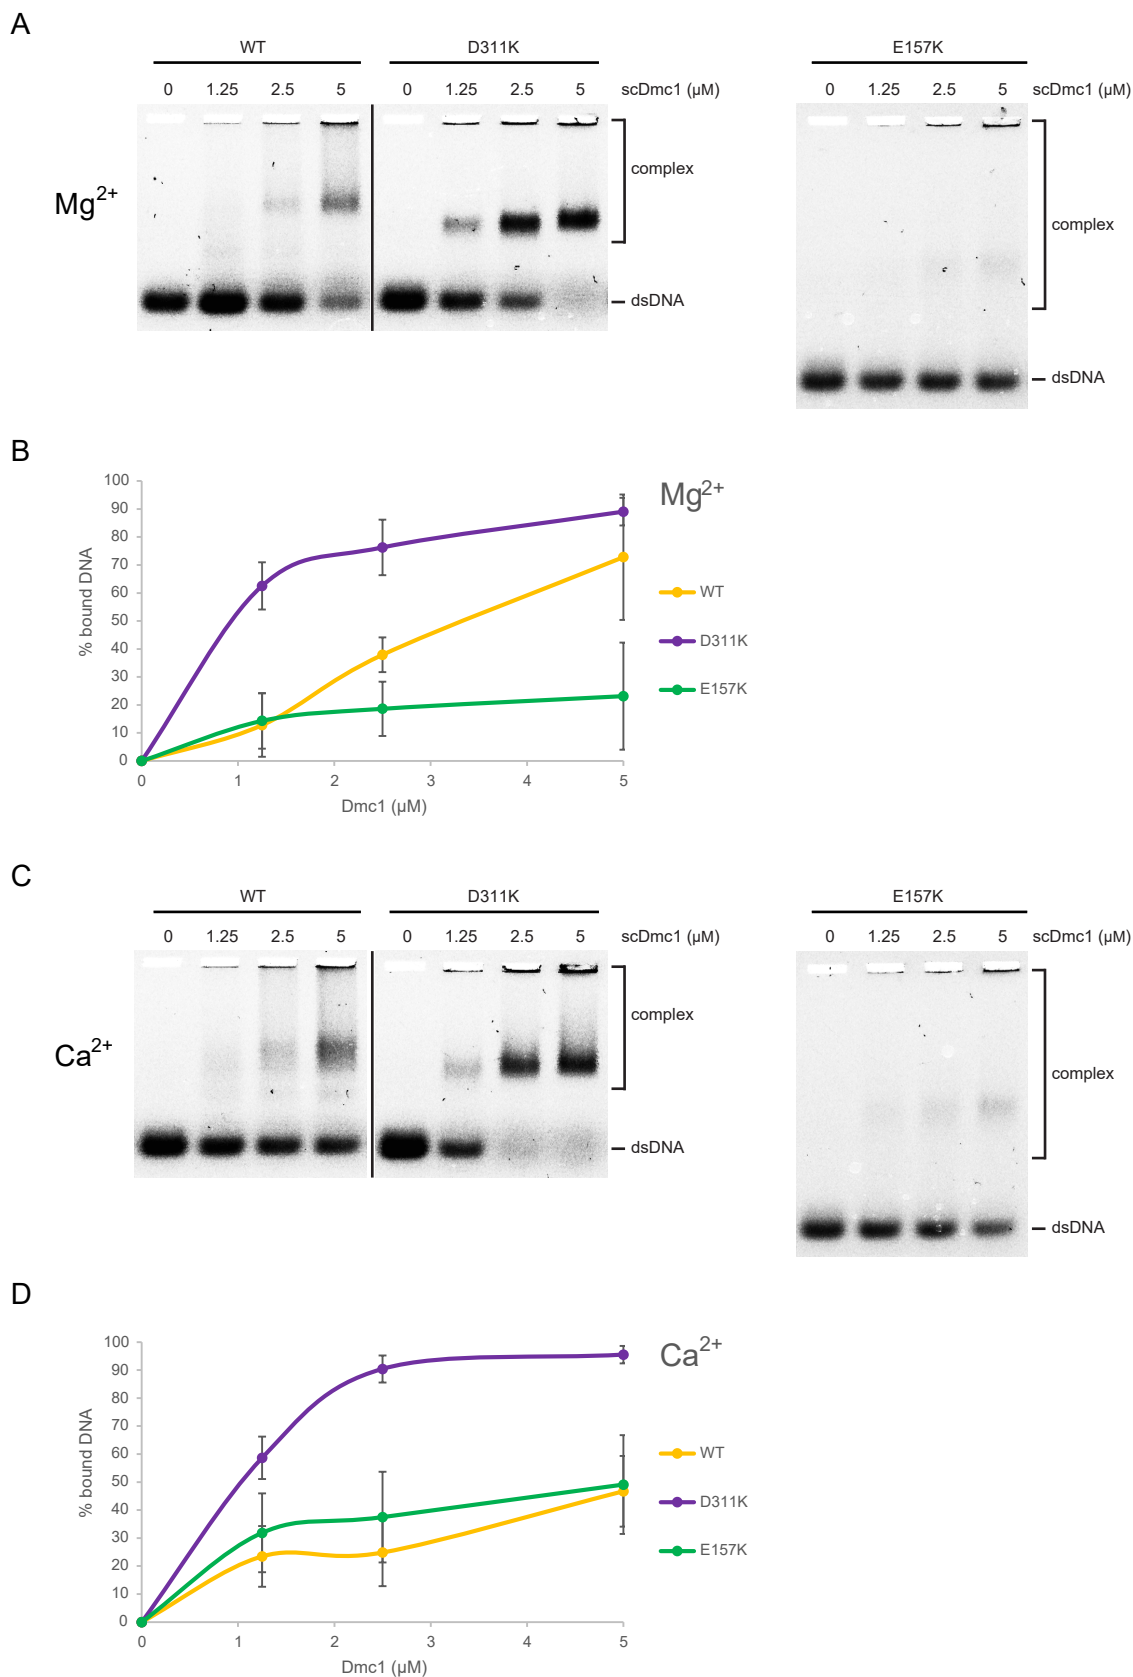

**Figure S6, related to Figure 5. *dsDNA* binding activity of yeast *Dmc1* mutants.** (A) DNA binding of *Dmc1* mutants (1.25, 2.5 and 5  $\mu M$ ) to 5'-fluorescently labeled *dsDNA* (0.5  $\mu M$  base pairs) in the presence of 1 mM ATP and 1 mM  $MgCl_2$  analyzed by gel-based assay. (B) Graphical representation of data from (A). The error bars represent the standard deviation from three independent experiments. (C) DNA binding of *Dmc1* mutants (1.25, 2.5 and 5  $\mu M$ ) to 5'-fluorescently labeled *dsDNA* (0.5  $\mu M$  base pairs) in the presence of 1 mM ATP and 1 mM  $CaCl_2$  analyzed by gel-based assay. (D) Graphical representation of data from (C). The error bars represent the standard deviation from three independent experiments.



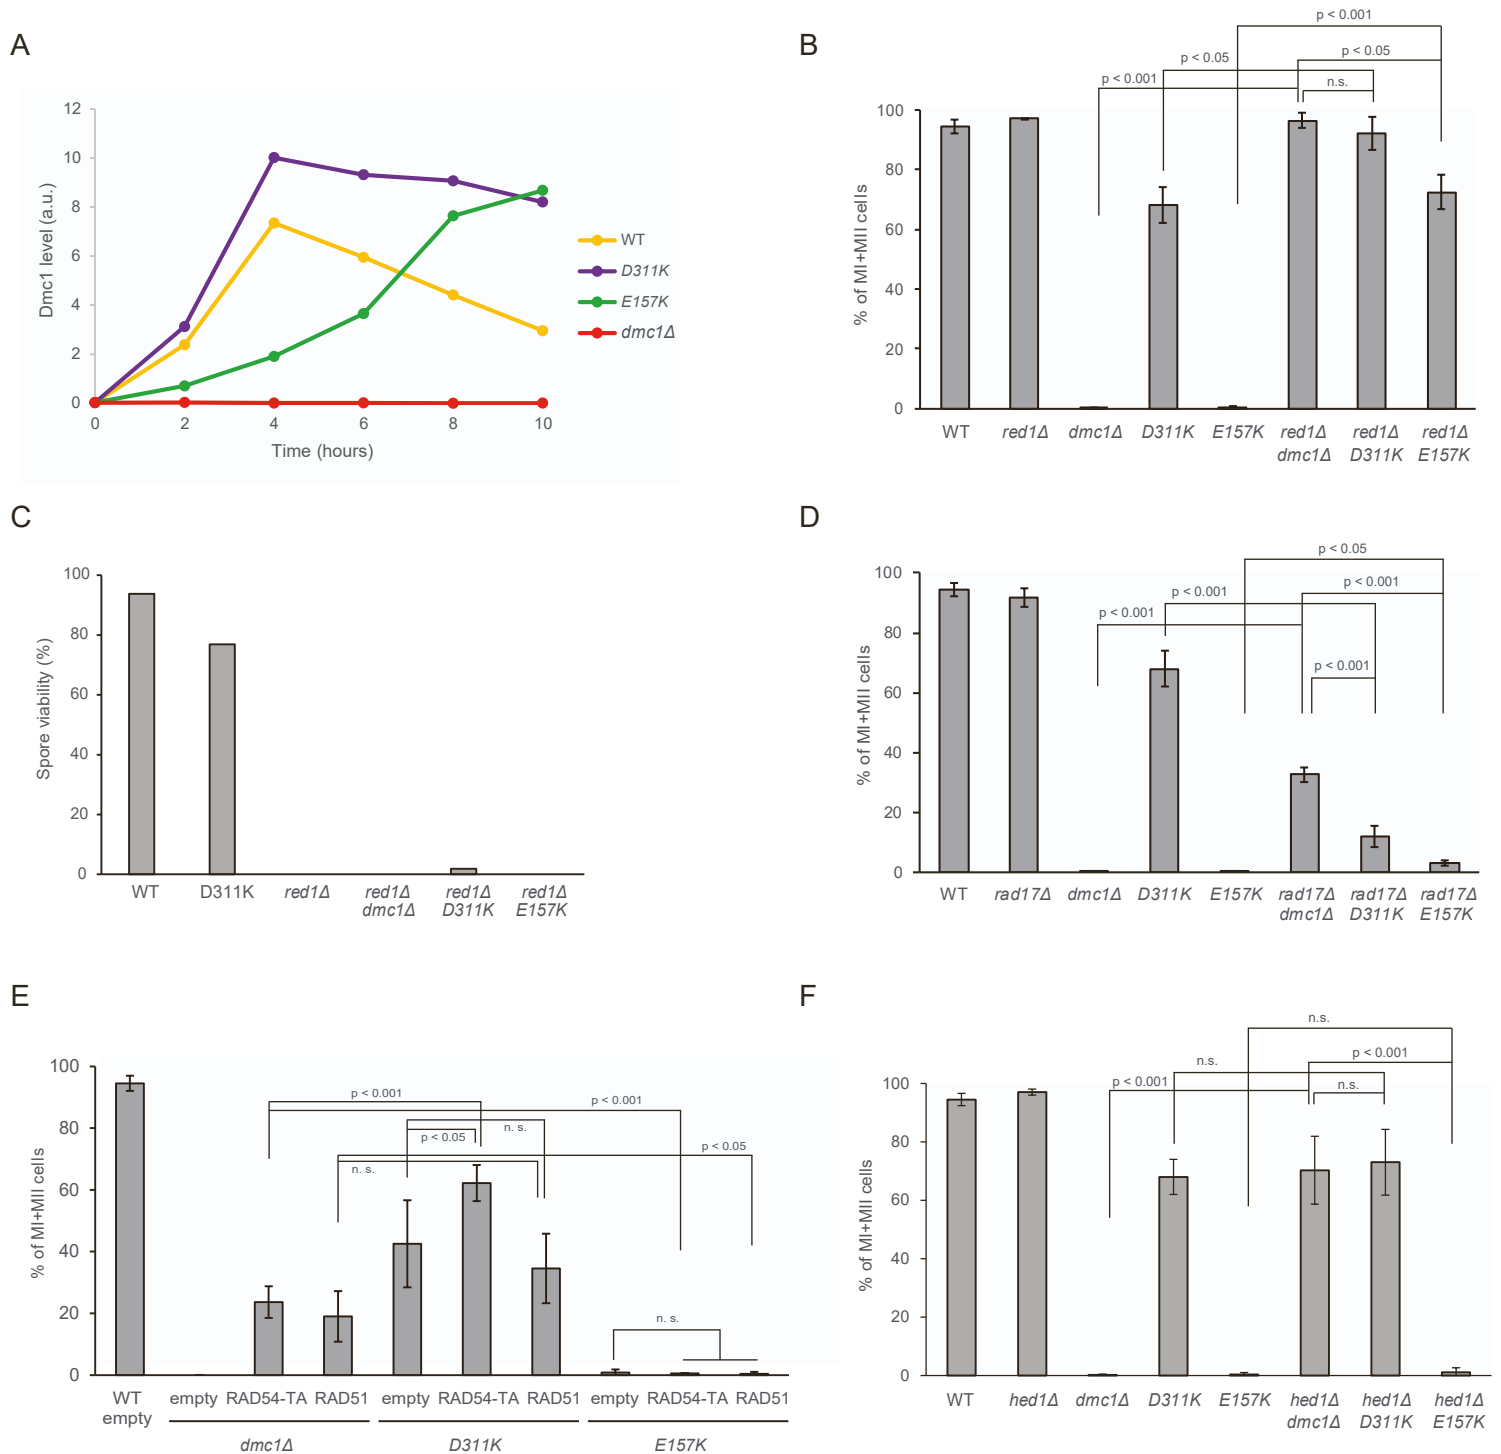

**Figure S7, related to Figure 5. Phenotypic characterization of yeast *dmc1* mutants.** (A) The quantification of Dmc1 signal from Figure 5D. The signal was corrected to amount of loading control of PGK1 signal, and subsequently normalized to signal of unspecific band at 6 hours. (B) DAPI analysis of meiotic divisions in *dmc1* mutants in *red1* deletion background. The analysis was done as in Figure 5E. (C) Spore viability of selected *dmc1* strains. Spore viability was assayed by tetrad dissection of 40 diploid colonies for each strain. (D) DAPI analysis of meiotic divisions in *dmc1* mutants in *rad17* deletion background. The analysis was done as in Figure 5E. (E) DAPI analysis of meiotic divisions in *dmc1* mutants in strains overexpressing Rad51 or Rad54-T132A mutant, respectively. Cells were harvested after 12 hours after synchronous induction of meiosis and the analysis was done as in Figure 5E except of for wt at least 65 cells were analyzed from each culture. (F) DAPI analysis of meiotic divisions in *dmc1* mutants in *hed1* deletion background. The analysis was done as in Figure 5E.



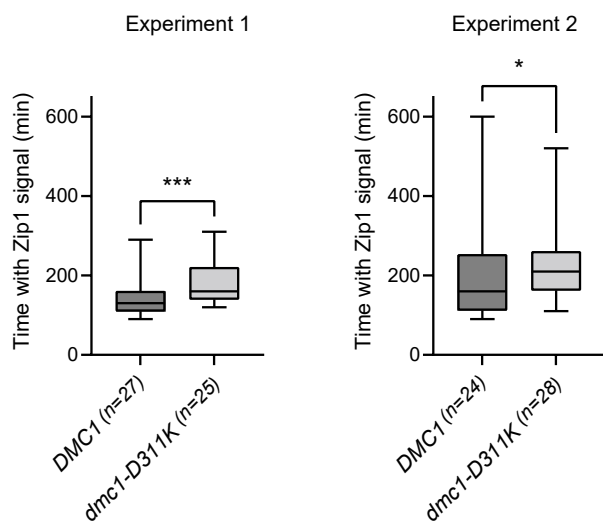

**Figure S8, related to Figure 6.** Duration of *Zip1* signal in *dmc1* strains. Box plot depicts median with lower and upper quartile of the duration of *dmc1Δ/DMC1* and *dmc1Δ/dmc1-D311K* cells having accumulated *Zip1* signal. Whiskers represent minimum and maximum (two-tailed unpaired t test; \* $p < 0.05$ , \*\* $p < 0.01$ ). The two independent experiments are shown separately.

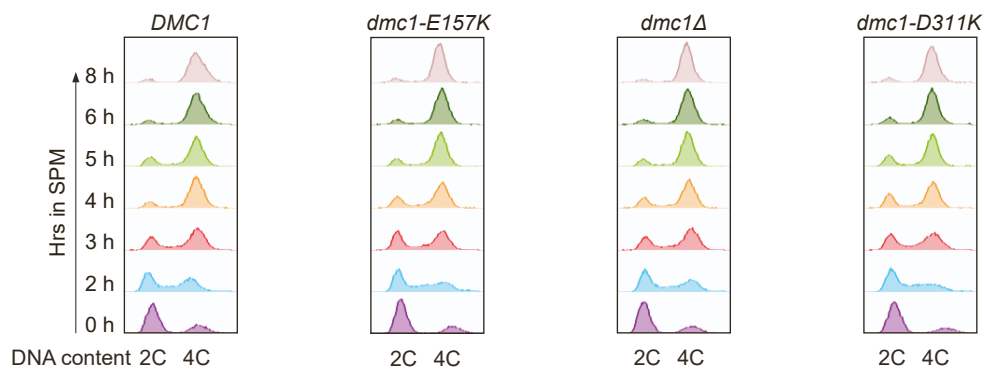

**Figure S9, related to Figure 7.** *FACS analysis of meiotic progression of dmc1 strains. S. cerevisiae* strains with the indicated genotypes were synchronously released to undergo meiosis from G0/G1 by transferring cells into sporulation medium (SPM). Cells were collected at indicated time points and DNA content was analyzed by fluorescence-activated cell-sorting. The image shown is representative of two independent experiments.

**Table S1 (related to STAR Methods).** Oligonucleotides used in the study.

| <b>Name</b>      | <b>Sequence</b>                                                                                |
|------------------|------------------------------------------------------------------------------------------------|
| hDMC1-D317A fwd  | TTGCCAAGATTTATGCCAGTCCTGAGATGCC                                                                |
| hDMC1-D317A rev  | GGCATCTCAGGACTGGCATAAATCTTGGCAA                                                                |
| hDMC1-D317K fwd  | GGAGAGCTCAGAATTGCCAAGATTTATAAGAGTCCTGAGATGCC                                                   |
| hDMC1-D317K rev  | GGCATCTCAGGACTCTTATAAATCTTGGCAATTCTGAGCTCTCC                                                   |
| hDMC1-E162A fwd  | TCTTCATTGATACAGCAAATACTTTCCGTCC                                                                |
| hDMC1-E162A rev  | GGACGGAAAGTATTTGCTGTATCAATGAAGA                                                                |
| hDMC1-E162K fwd  | GCGATCTGGACGGAAAGTATTTTTGTATCAATGAAGATAATCTTTC                                                 |
| hDMC1-E162K rev  | GAAAGATTATCTTCATTGATACAAAAAATACTTTCCGTCCAGATCGC                                                |
| scDmc1-D311K fwd | AGTTGCCAAGTTACAAAAATCCCCAGATATGCCTG                                                            |
| scDmc1-D311K rev | CAGGCATATCTGGGGATTTTTGTAACCTTGGCAACT                                                           |
| scDmc1-E157K fwd | CGGGCCTGAAAGTGCCTTTTGTATCAATATATGCTACTTTC                                                      |
| scDmc1-E157K rev | GAAAGTAGCATATATTGATACAAAAGGCACTTTCAGGCCCG                                                      |
| pR231            | AAATCAATCTAAAGTATATATGAGTAAACTTGGTCTGACAGTTACCAATGCTTAATC<br>AGTGAGGCACCTATCTCAGCGATCTGTCTATTT |
| pR27             | AGCTACCATGCCTGCACGAATTAAGCAATTCGTAATCATGGTCATAGCT                                              |
| pR28             | AGCTATGACCATGATTACGAATTGCTTAATTCGTGCAGGCATGGTAGCT                                              |
| Δred1 fwd        | GAACAAAGATTTTTTAATCAGTGAGGACCACAAAGGGACAGCAAATACGGTGATAAG<br>ACGTACGCTGCAGGTCGAC               |
| Δred1 rev        | CTTTTATTAGCCATCTTAAATCTAAAAAGAATTGCGTATATGTATACTATTTAATCG<br>ATGAATTCGAGCTCG                   |
| Δrad17 fwd       | CAAATCAATCTCACAGAACGGTGTGGAAACAAAGTAGTTGAAGGATTTCAACTCGTA<br>CGCTGCAGGTCGAC                    |
| Δrad17 rev       | CCAAATGCTGAATGAAGTTCTGCGTTTTCTGCGATGCTGGATATTGACTTAATCGAT<br>GAATTCGAGCTCG                     |
| Δhed1 fwd        | GGTTAAATTCTTGAATTACAACACTACATGTCAGAGACGAACGAAAGAGAGAAATCAAG<br>ACGCGTACGCTGCAGGTCGAC           |
| Δhed1 rev        | ACGTTGAAAAAAGTGGAGGGCCACCGAACTCTTTTTCAAACGTTCTCCTCTTTGAAC<br>TTAATCGATGAATTCGAGCTCG            |

**Table S2 (related to STAR Methods). Yeast strains used in this study.**

| Strain  | Genotype                                                                                                                         | Source     |
|---------|----------------------------------------------------------------------------------------------------------------------------------|------------|
| NHY1210 | MATa ho::hisG leu2::hisG ura3( $\Delta$ Sma-Pst) HIS4::LEU2-(BamHI; +ori)                                                        | N. Hunter  |
| NHY1215 | MAT $\alpha$ ho::hisG leu2::hisG ura3( $\Delta$ Sma-Pst) his4-X::LEU2-(NgoMIV; +ori)                                             | N. Hunter  |
| yLK561  | MATa ho::hisG leu2::hisG ura3( $\Delta$ Sma-Pst) HIS4::LEU2-(BamHI; +ori) dmc1-D311K                                             | This study |
| yLK562  | MAT $\alpha$ ho::hisG leu2::hisG ura3( $\Delta$ Sma-Pst) his4-X::LEU2-(NgoMIV; +ori) dmc1-D311K                                  | This study |
| yLK565  | MATa ho::hisG leu2::hisG ura3( $\Delta$ Sma-Pst) HIS4::LEU2-(BamHI; +ori) dmc1-E157K                                             | This study |
| yLK566  | MAT $\alpha$ ho::hisG leu2::hisG ura3( $\Delta$ Sma-Pst) his4-X::LEU2-(NgoMIV; +ori) dmc1-E157K                                  | This study |
| yLK575  | MATa ho::hisG leu2::hisG ura3( $\Delta$ Sma-Pst) HIS4::LEU2-(BamHI; +ori) $\Delta$ dmc1::kanMX4                                  | This study |
| yLK578  | MAT $\alpha$ ho::hisG leu2::hisG ura3( $\Delta$ Sma-Pst) his4-X::LEU2-(NgoMIV; +ori) $\Delta$ dmc1::kanMX4                       | This study |
| yLK540  | MATa ho::hisG leu2::hisG ura3( $\Delta$ Sma-Pst) HIS4::LEU2-(BamHI; +ori) dmc1-D311K $\Delta$ red1::natMX                        | This study |
| yLK541  | MAT $\alpha$ ho::hisG leu2::hisG ura3( $\Delta$ Sma-Pst) his4-X::LEU2-(NgoMIV; +ori) dmc1-D311K $\Delta$ red1::natMX             | This study |
| yLK545  | MATa ho::hisG leu2::hisG ura3( $\Delta$ Sma-Pst) HIS4::LEU2-(BamHI; +ori) dmc1-E157K $\Delta$ red1::natMX                        | This study |
| yLK550  | MAT $\alpha$ ho::hisG leu2::hisG ura3( $\Delta$ Sma-Pst) his4-X::LEU2-(NgoMIV; +ori) dmc1-E157K $\Delta$ red1::natMX             | This study |
| yLK514  | MATa ho::hisG leu2::hisG ura3( $\Delta$ Sma-Pst) HIS4::LEU2-(BamHI; +ori) $\Delta$ red1::natMX                                   | This study |
| yLK527  | MAT $\alpha$ ho::hisG leu2::hisG ura3( $\Delta$ Sma-Pst) his4-X::LEU2-(NgoMIV; +ori) $\Delta$ red1::natMX                        | This study |
| yLK557  | MATa ho::hisG leu2::hisG ura3( $\Delta$ Sma-Pst) HIS4::LEU2-(BamHI; +ori) $\Delta$ dmc1::kanMX4 $\Delta$ red1::natMX             | This study |
| yLK558  | MAT $\alpha$ ho::hisG leu2::hisG ura3( $\Delta$ Sma-Pst) his4-X::LEU2-(NgoMIV; +ori) $\Delta$ dmc1::kanMX4 $\Delta$ red1::natMX  | This study |
| yLK581  | MATa ho::hisG leu2::hisG ura3( $\Delta$ Sma-Pst) HIS4::LEU2-(BamHI; +ori) dmc1-D311K $\Delta$ rad17::natMX                       | This study |
| yLK580  | MAT $\alpha$ ho::hisG leu2::hisG ura3( $\Delta$ Sma-Pst) his4-X::LEU2-(NgoMIV; +ori) dmc1-D311K $\Delta$ rad17::natMX            | This study |
| yLK582  | MATa ho::hisG leu2::hisG ura3( $\Delta$ Sma-Pst) HIS4::LEU2-(BamHI; +ori) dmc1-E157K $\Delta$ rad17::natMX                       | This study |
| yLK579  | MAT $\alpha$ ho::hisG leu2::hisG ura3( $\Delta$ Sma-Pst) his4-X::LEU2-(NgoMIV; +ori) dmc1-E157K $\Delta$ rad17::natMX            | This study |
| yLK506  | MATa ho::hisG leu2::hisG ura3( $\Delta$ Sma-Pst) HIS4::LEU2-(BamHI; +ori) $\Delta$ rad17::natMX                                  | This study |
| yLK507  | MAT $\alpha$ ho::hisG leu2::hisG ura3( $\Delta$ Sma-Pst) his4-X::LEU2-(NgoMIV; +ori) $\Delta$ rad17::natMX                       | This study |
| yLK483  | MATa ho::hisG leu2::hisG ura3( $\Delta$ Sma-Pst) HIS4::LEU2-(BamHI; +ori) $\Delta$ dmc1::kanMX4 $\Delta$ rad17::natMX            | This study |
| yLK543  | MAT $\alpha$ ho::hisG leu2::hisG ura3( $\Delta$ Sma-Pst) his4-X::LEU2-(NgoMIV; +ori) $\Delta$ dmc1::kanMX4 $\Delta$ rad17::natMX | This study |
| yLK433  | MATa ho::hisG leu2::hisG ura3( $\Delta$ Sma-Pst) HIS4::LEU2-(BamHI; +ori) $\Delta$ hed1::natMX                                   | This study |
| yLK440  | MAT $\alpha$ ho::hisG leu2::hisG ura3( $\Delta$ Sma-Pst) his4-X::LEU2-(NgoMIV; +ori) $\Delta$ hed1::natMX                        | This study |
| yLK436  | MATa ho::hisG leu2::hisG ura3( $\Delta$ Sma-Pst) HIS4::LEU2-(BamHI; +ori) $\Delta$ dmc1::kanMX4 $\Delta$ hed1::natMX             | This study |
| yLK437  | MAT $\alpha$ ho::hisG leu2::hisG ura3( $\Delta$ Sma-Pst) his4-X::LEU2-(NgoMIV; +ori) $\Delta$ dmc1::kanMX4 $\Delta$ hed1::natMX  | This study |

|          |                                                                                                                                                       |            |
|----------|-------------------------------------------------------------------------------------------------------------------------------------------------------|------------|
| yLK449   | MATa ho::hisG leu2::hisG ura3( $\Delta$ Sma-Pst) HIS4::LEU2-(BamHI; +ori)<br>$\Delta$ hed1::natMX dmc1-D311K                                          | This study |
| yLK443   | MAT $\alpha$ ho::hisG leu2::hisG ura3( $\Delta$ Sma-Pst) his4-X::LEU2-(NgoMIV; +ori)<br>$\Delta$ hed1::natMX dmc1-D311K                               | This study |
| yLK434   | MATa ho::hisG leu2::hisG ura3( $\Delta$ Sma-Pst) HIS4::LEU2-(BamHI; +ori)<br>$\Delta$ hed1::natMX dmc1-E157K                                          | This study |
| yLK435   | MAT $\alpha$ ho::hisG leu2::hisG ura3( $\Delta$ Sma-Pst) his4-X::LEU2-(NgoMIV; +ori)<br>$\Delta$ hed1::natMX dmc1-E157K                               | This study |
| YJM13677 | MATa/MATalpha dmc1 $\Delta$ ::KanMX4/DMC1 ZIP1::GFP(700)-HphMX4/ZIP1<br>CNM67-tdTomato-NatMX4/ CNM67<br>his4-X::LEU2-(NgoMIV; +ori)/HIS4::LEU2        | This study |
| YJM13678 | MATa/MATalpha dmc1 $\Delta$ ::KanMX4/dmc1-D311K ZIP1::GFP(700)-<br>HphMX4/ZIP1 CNM67-tdTomato-NatMX4/ CNM67<br>his4-X::LEU2-(NgoMIV; +ori)/HIS4::LEU2 | This study |
| YJM13679 | MATa/MATalpha dmc1 $\Delta$ ::KanMX4/dmc1-E157K ZIP1::GFP(700)-<br>HphMX4/ZIP1 CNM67-tdTomato-NatMX4/ CNM67                                           | This study |
| YJM13680 | MATa/MATalpha dmc1 $\Delta$ ::KanMX4 ZIP1::GFP(700)-HphMX4/ZIP1 CNM67-<br>tdTomato-NatMX4/ CNM67                                                      | This study |
| YJM13718 | MATa/MATalpha dmc1 $\Delta$ ::KanMX4/DMC1 ZIP1::GFP(700)-HphMX4/ZIP1<br>CNM67-tdTomato-NatMX4/ CNM67<br>his4-X::LEU2-(NgoMIV; +ori)/ HIS4::LEU2       | This study |
| YJM13719 | MATa/MATalpha dmc1 $\Delta$ ::KanMX4/dmc1-D311K ZIP1::GFP(700)-<br>HphMX4/ZIP1 CNM67-tdTomato-NatMX4/ CNM67                                           | This study |
| YJM13720 | MATa/MATalpha dmc1 $\Delta$ ::KanMX4/dmc1-E157K ZIP1::GFP(700)-<br>HphMX4/ZIP1 CNM67-tdTomato-NatMX4/ CNM67                                           | This study |
| YJM13721 | MATa/MATalpha dmc1 $\Delta$ ::KanMX4 ZIP1::GFP(700)-HphMX4/ZIP1 CNM67-<br>tdTomato-NatMX4/ CNM67                                                      | This study |
